# Supplementary material for: Organic–inorganic hybrid (CH3NH3)2FeCuI4Cl2 and (CH3NH3)2InCuI6 for ultraviolet light photodetectors
Source: Royal Society of Chemistry journal article supplement (doi:10.1039/c9cc09408c), 2019-12-23
Supplement: c9cc09408c1.pdf [file c9cc09408c1.pdf]

## Electronic Supplementary Information

### Organic–inorganic Hybrid $(\text{CH}_3\text{NH}_3)_2\text{FeCuI}_4\text{Cl}_2$ and $(\text{CH}_3\text{NH}_3)_2\text{InCuI}_6$ for Ultraviolet Light Photodetector

Siwen Tao,<sup>a,b</sup> Yan Chen,<sup>a,b</sup> Jiawen Cui,<sup>a</sup> Huawei Zhou,<sup>\*a</sup> Ning Yu,<sup>a</sup> Xiaorui Gao,<sup>a</sup> Shuting Cui,<sup>a</sup>  
Cang Yuan,<sup>a</sup> Meiqian Liu,<sup>a</sup> Miaomiao Wang,<sup>a</sup> Xiaojun Wang,<sup>a</sup> Haoyu Gong,<sup>a</sup> Yanmin Li,<sup>a</sup> Tian  
Liu,<sup>a</sup> Xun Sun,<sup>a</sup> Jie Yin,<sup>\*a</sup> and Xianxi Zhang,<sup>\*a</sup> Mingxing Wu<sup>\*c</sup>

<sup>a</sup>School of Chemistry and Chemical Engineering; College of Materials Science and Engineering; Shandong Provincial Key Laboratory/Collaborative Innovation Center of Chemical Energy Storage; Liaocheng University.

<sup>b</sup>Siwen Tao and Yan Chen contributed equally.

<sup>c</sup>Key Laboratory of Inorganic Nano-materials of Hebei Province, College of Chemistry and Material Science, Hebei Normal University, No. 20 Rd. East of 2nd Ring South, Yuhua District, Shijiazhuang City, Hebei Province, 050024, China.

\* E-mail: zhouhuaweiopv@163.com; [yinjieily@163.com](mailto:yinjieily@163.com); [mingxing.wu@hebtu.edu.cn](mailto:mingxing.wu@hebtu.edu.cn)

#### 1. Experimental Section

**Preparation of solution:** The  $\text{MA}_2\text{FeCuI}_4\text{Cl}_2$  solution was prepared as follows. The molar ratio of  $\text{FeCl}_3$ :CuI [Alfaesa (China) Chemistry Co., Ltd.]: MAI (Yingkou OPV Tech New Energy Co. Ltd) was 1:1:5. Firstly, 162.20 mg  $\text{FeCl}_3$  was dissolved in 1 mL DMF. Subsequently, 190.45 mg CuI was added into above solution. The mixed solution is dissolved well. Finally, 794.5 mg MAI was added into the mixed solution. The  $\text{MA}_2\text{FeCuI}_4\text{Cl}_2$  solution was prepared successfully. In the preparation of the  $\text{MA}_2\text{InCuI}_6$  solution, the molar ratio of  $\text{InI}_3$ :CuI:MAI was 1:1:2, and the other preparation steps were the same as that of  $\text{MA}_2\text{FeCuI}_4\text{Cl}_2$ .

**Fabrication of photodetector device based on  $\text{MA}_2\text{FeCuI}_4\text{Cl}_2$  and  $\text{MA}_2\text{InCuI}_6$ :** Briefly, 15  $\Omega\text{sq}^{-1}$  FTO-coated glass substrates were cleaned sequentially in a washing liquid, deionized water, and ethanol. In an argon-filled glove box, FTO-coated glass substrates with a sheet resistance of 15  $\Omega\text{sq}^{-1}$  were covered with a  $\text{TiO}_2$  compact layer by spin-coating the  $\text{TiO}_2$  organic sol at 3000 r.p.m. for 30s, tracked by drying at 450°C for 60 min (following our earlier literature).<sup>1</sup> The  $\text{M-TiO}_2$  layer was coated with a commercial  $\text{TiO}_2$  paste (18NR-T) diluted in ethanol (1:3.5, weight

ratio) by spin coating at 5000 r.p.m for 30 s, followed by gradually heating to 500 °C and maintained at this temperature for 30 min. After the drying was completed, the solution of  $\text{MA}_2\text{FeCuI}_4\text{Cl}_2$  was spin-coated by a two-step spin coating method. The parameter settings are 1000r.p.m for 5 s and 6000 r.p.m for 20 s, then heated at 45 °C for 30 min on the hot plate. Gold electrodes were then deposited by evaporation under high vacuum of  $1.2 \times 10^{-4}$  Pa.

**Characterization:** Nanostructures of the films and photodetector devices were analyzed by scanning electron microscopy (Thermo Fisher Scientific SEM GX4). The photocurrent density–time performance at different wavelengths and electrochemical impedance of photodetector device were carried out by an electrochemical workstation system(ZAHNER CIMPS-2 pro, Germany). The electrochemical impedance is carried out from 1 MHz to 0.05Hz. The photocurrent of devices was measured under the bias voltage of 0.00 V. The physical property of  $\text{MA}_2\text{InCuI}_6$  compounds were measured by Hall effect measurement system (MMR technologies. Inc. USA). The test parameters are as follows: (magnetic field intensity: 0.5 T, thickness of  $\text{MA}_2\text{InCuI}_6$  film: 500 nm, area:  $1 \times 1$  cm ). UV–vis absorption spectra were recorded using a UV–vis–NIR spectrometer (PerkinElmer,  $\lambda$ , 750S).

## 2. Results

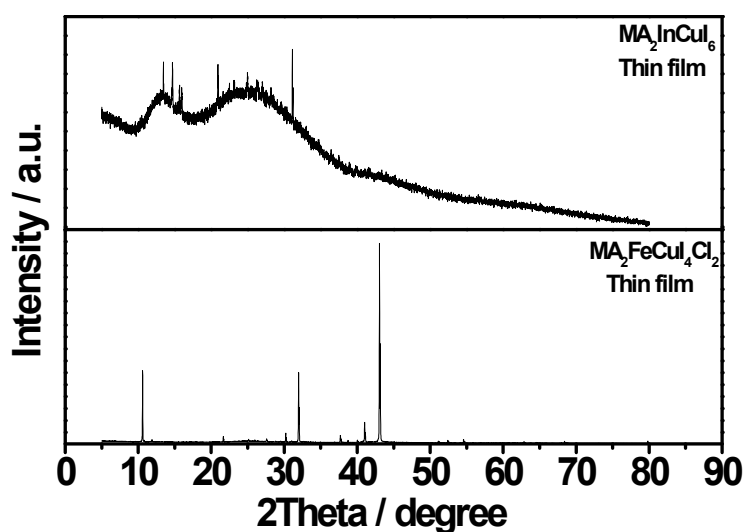

Figure S1 X-ray diffraction patterns of  $\text{MA}_2\text{FeCuI}_4\text{Cl}_2$  and  $\text{MA}_2\text{InCuI}_6$  film

The XRD patterns of  $\text{MA}_2\text{FeCuI}_4\text{Cl}_2$  and  $\text{MA}_2\text{InCuI}_6$  are shown in the Figure S1. The diffraction peaks of  $\text{MA}_2\text{FeCuI}_4\text{Cl}_2$  appear at 10.51, 32.01 and 43.01 degrees. According to Bragg law  $2d\sin\theta=n\lambda$  (where  $d$ , interplanar distance,  $\lambda$ , wavelength of the incident X-ray beam,  $\theta$ , diffraction angle), the interplanar distance of 10.51 degrees is about 8.3 Å. The large interplanar distance indicates that  $\text{MA}_2\text{FeCuI}_4\text{Cl}_2$  is layered structure. We speculate that the corresponding crystal planar of diffraction peaks at 10.51, 32.01 and 43.01 degrees should be (001), (003) and (004), respectively. The position of the diffraction peak at the minimum diffraction angle for  $\text{MA}_2\text{InCuI}_6$  is 13.35 degrees. The results show that the interplanar distance of  $\text{MA}_2\text{InCuI}_6$  is smaller than that of  $\text{MA}_2\text{FeCuI}_4\text{Cl}_2$ . Thus,  $\text{MA}_2\text{InCuI}_6$  is a three-dimensional-like perovskite structure. This may be the reason for its better photoelectric performance than that of  $\text{MA}_2\text{FeCuI}_4\text{Cl}_2$ .

Table S1 Physical properties of  $\text{MA}_2\text{InCuI}_6$  at 300.0 K

| Physical property                         |             |
|-------------------------------------------|-------------|
| Resistivity (ohm*cm)                      | +1.9303E+04 |
| Mobility ( $\text{cm}^2/\text{Vs}$ )      | -1.0860E+04 |
| Density ( $\text{cm}^{-3}$ )              | -2.9774E+10 |
| Hall Coeff. ( $\text{cm}^3/\text{Coul}$ ) | -2.0965E+08 |
| Sheet Res. (ohm/ $\text{cm}^2$ )          | +1.9303E+08 |
| Type of Carriers                          | Electrons   |

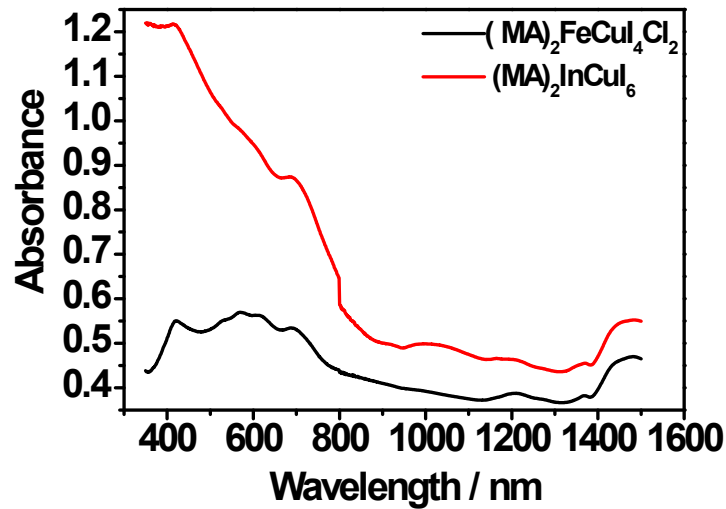

Figure S2 The absorption spectra of  $\text{MA}_2\text{FeCuI}_4\text{Cl}_2$  and  $\text{MA}_2\text{InCuI}_6$

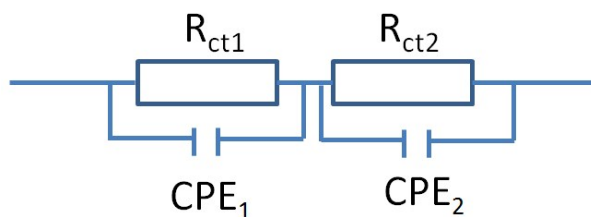

Figure S3 The equivalent circuit diagram of EIS for FTO/C-TiO<sub>2</sub>/M-TiO<sub>2</sub>/MA<sub>2</sub>InCuI<sub>6</sub>/Au

The charge transfer resistance ( $R_{ct1}$ ) and constant phase element ( $CPE_1$ ) come from the charge transfer between organic-inorganic hybrid materials and TiO<sub>2</sub>. The charge transfer resistance ( $R_{ct2}$ ) and constant phase element ( $CPE_2$ ) come from the charge transfer between organic-inorganic hybrid materials and Au electrode.

1. Zhou, H.; Shi, Y.; Dong, Q.; Zhang, H.; Xing, Y.; Wang, K.; Du, Y.; Ma, T., *Journal of Physical Chemistry Letters* **2014**, 5 (18), 3241-3246.
